# Supplementary material for: Delineating the interplay between oncogenic pathways and immunity in anaplastic Wilms tumors
Source: PubMed Central journal article supplement (PMC10689851; doi:10.1038/s41467-023-43290-3), 2023-11-30
Supplement: 41467_2023_43290_MOESM1_ESM.pdf [file 41467_2023_43290_MOESM1_ESM.pdf]

## **Supplementary Information for**

Delineating the interplay between oncogenic pathways and immunity in anaplastic Wilms tumors

Su *et al.*

**SUPPLEMENTARY FIGURES**

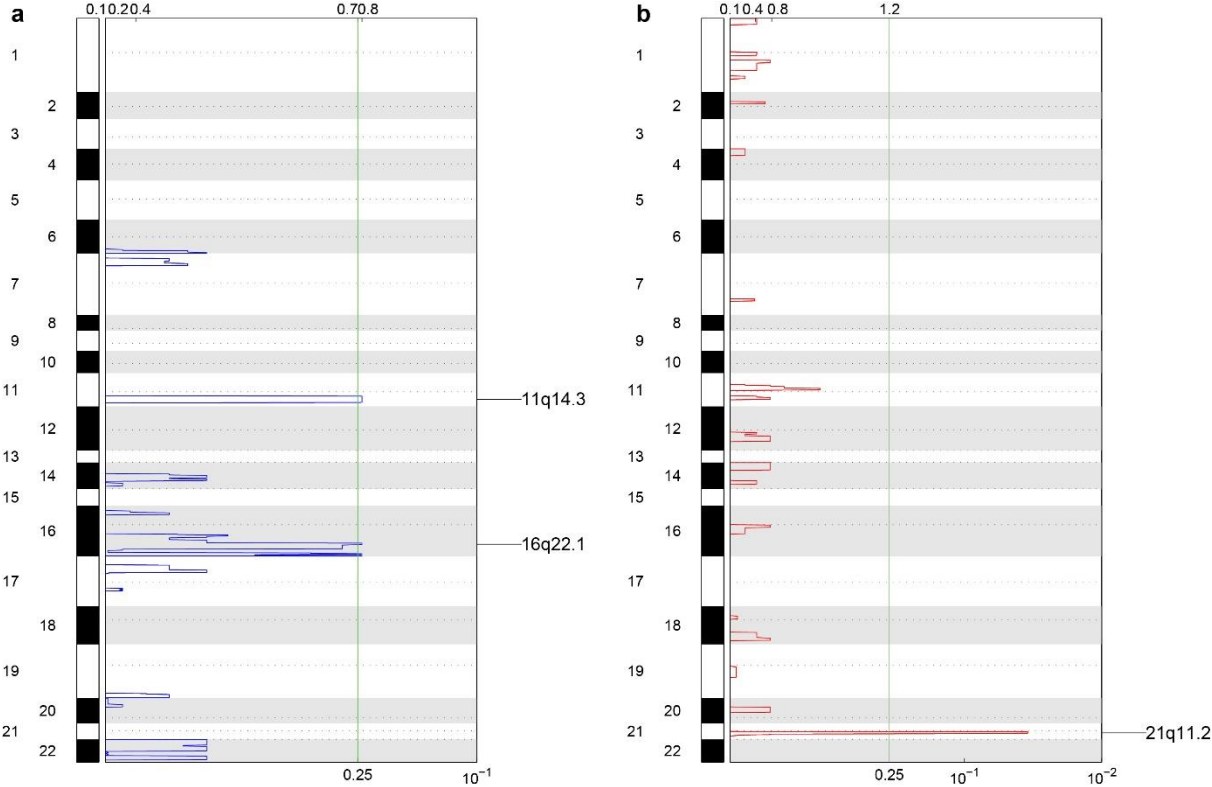

**Supplementary Figure 1. Recurrent of copy number alteration (CNA).** CNA identified by GISTIC2.0 for **a** copy number deletion and **b** copy number amplification. Source data are provided as a Source Data file.

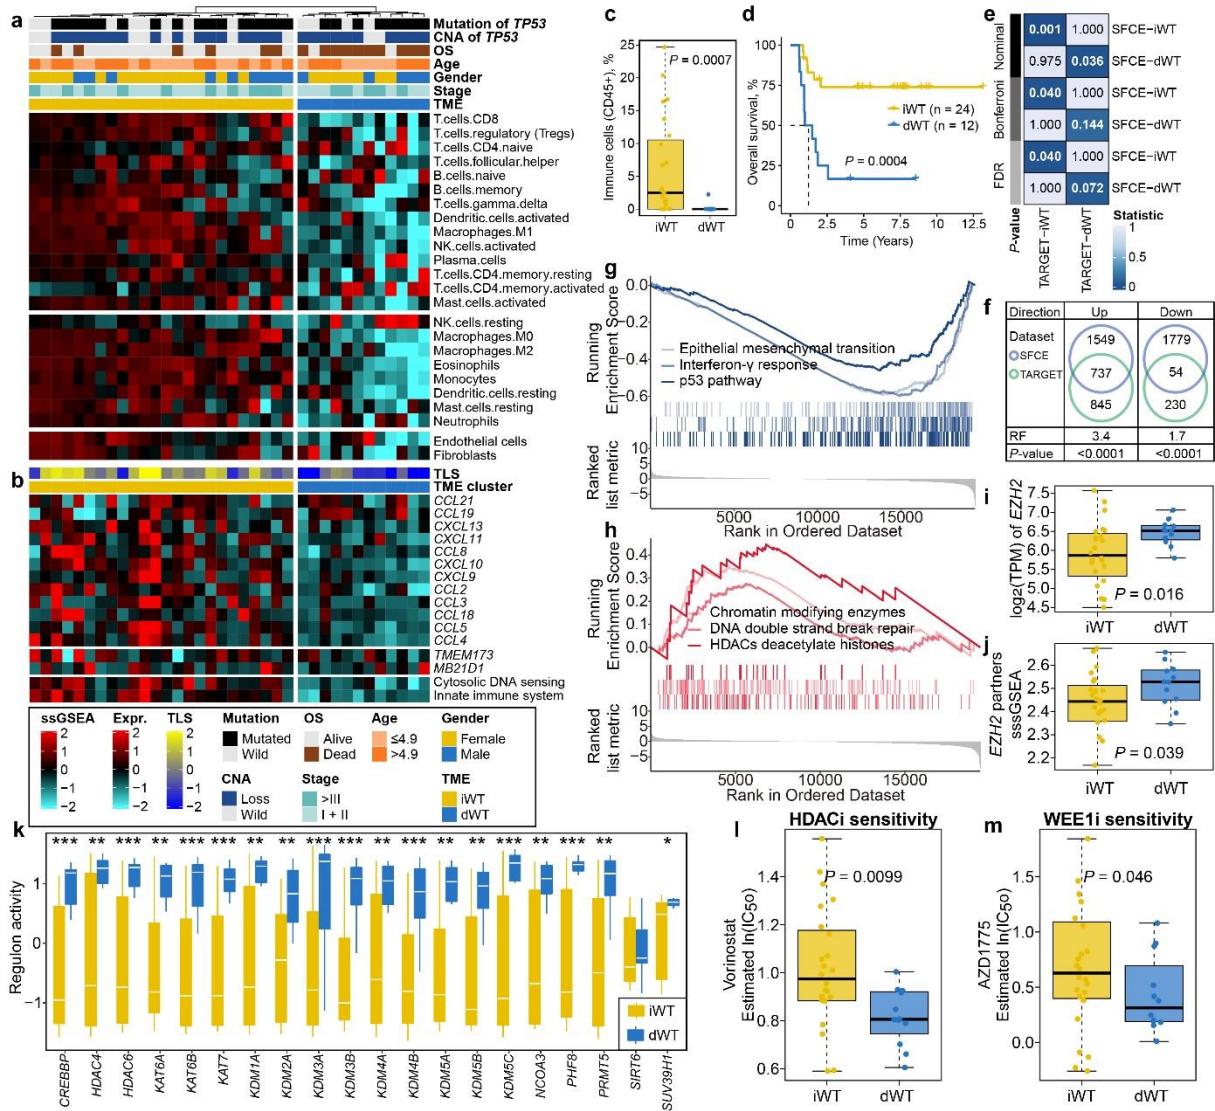

**Supplementary Figure 2. Validation using diffuse anaplastic Wilms tumor (DAWT) samples from TARGET-WT cohort.** **a** Heatmap showing two tumor microenvironment (TME) phenotypes using curated signatures of 24 microenvironment cell types. Clinicopathological information and genetic alteration were annotated in the top panel. **b** Heatmap showing different expression pattern of genes of interest. **c** Boxplot showing distribution of bulk immune cell proportions between iWT ( $n = 24$ ) and dWT ( $n = 12$ ) using deconvolution approach with two-sided Mann-Whitney test. **d** Kaplan-Meier curve of overall survival (OS) rate with two-sided log-rank test between two TME phenotypes. **e** Subclass mapping analysis revealing statistical similarity between SFCE and TARGET cohort regarding two TME phenotypes. Bonferroni and Benjamini-Hochberg correction (false discovery rate [FDR]) methods were used to adjust  $P$ -values. **f** Venn diagrams with representation factor (RF) revealing significant overlapping of the differentially expressed genes in dWT versus iWT subtypes between SFCE-WT and TARGET-WT cohorts. Gene set enrichment analysis curves showing significantly **g** downregulated and **h** upregulated pathways in dWT versus iWT. Boxplot showing expression of **i** *EZH2*, **j** enrichment score of *EZH2* partners, **k** chromatin remodeling regulons activity (\*  $P < 0.05$ , \*\*  $P < 0.01$ , \*\*\*  $P < 0.001$ ) using two-sided Mann-Whitney test, and estimated drug sensitivity of **l** HDAC inhibitor and **m** WEE1 inhibitor between two TME phenotypes using one-sided

Student's t-test. For all boxplots, the center line represents the median, box hinges represent first and third quartiles and whiskers represent  $\pm 1.5 \times$  interquartile range. Source data are provided as a Source Data file.

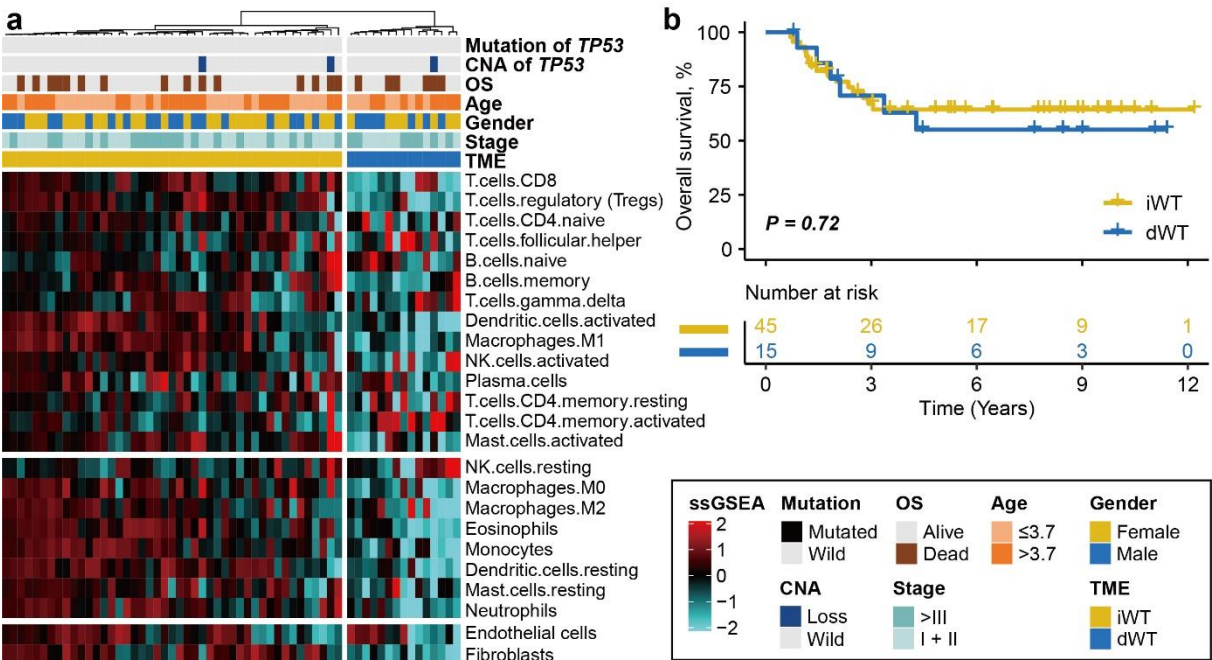

**Supplementary Figure 3. Identification of tumor microenvironment (TME) phenotypes in favorable histology Wilms tumor (FHWT) from TARGET-WT cohort.** **a** Heatmap showing two TME phenotypes (iWT,  $n = 45$ ; dWT,  $n = 15$ ) using curated signatures of 24 microenvironment cell types. Clinicopathological information and genetic alteration were annotated at the top panel. **b** Kaplan-Meier curve of overall survival (OS) rate with two-sided log-rank test between two TME phenotypes. Source data are provided as a Source Data file.

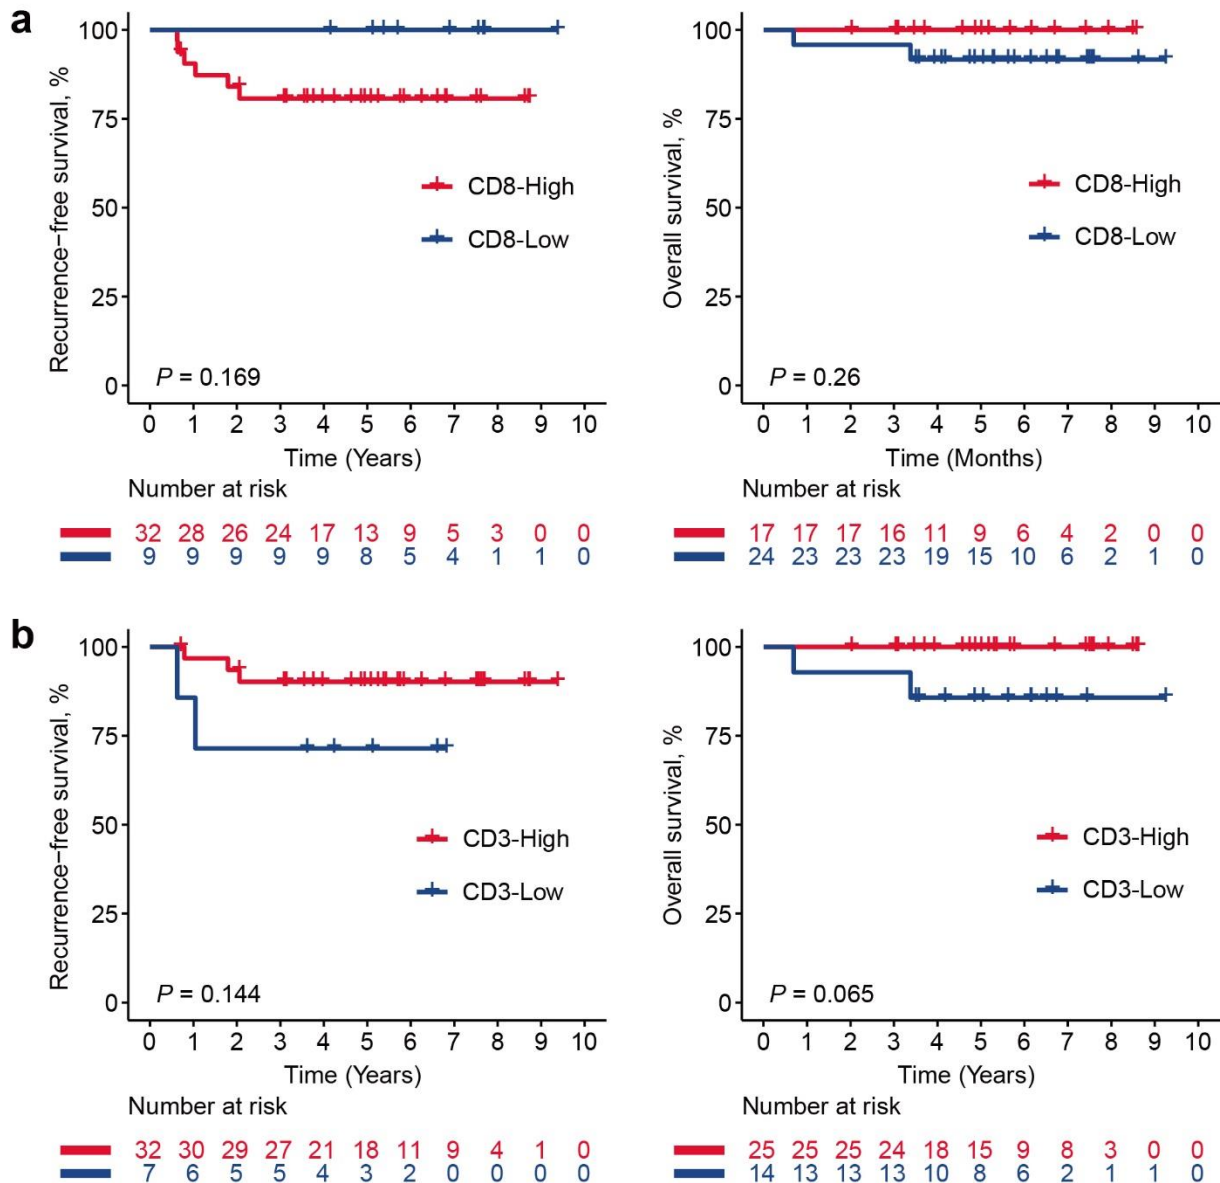

**Supplementary Figure 4. Prognostic value of tumor-infiltrating lymphocytes in pretreated non-anaplastic WTs.** **a** Kaplan-Meier curves of recurrence-free survival (RFS) (left panel) and overall survival (OS) (right panel) with two-sided log-rank test regarding the count of CD8 in non-anaplastic WTs ( $n = 41$ ; one not available for CD8 count). **b** Kaplan-Meier curves of RFS (left panel) and OS (right panel) with two-sided log-rank test regarding the count of CD3 in non-anaplastic WTs ( $n = 39$ ; three not available for CD3 count). Source data are provided as a Source Data file.

## SUPPLEMENTARY TABLES

**Supplementary Table 1.** Immunohistochemical details

| Antibody | Commercial source | Clone      | Dilution | Incubation (min) | Demasking (PH) |
|----------|-------------------|------------|----------|------------------|----------------|
| CD3      | DAKO              | Polyclonal | RTU      | 32               | 8              |
| CD8      | DAKO              | C8/144B    | 1/1000   | 36               | 8              |
| EZH2     | AbCAM             | ab191080   | 1/500    | 36               | 8              |

Abbreviation: RTU, ready to use
