# Supplementary material for: Delineating the interplay between oncogenic pathways and immunity in anaplastic Wilms tumors
Source: PubMed Central journal article supplement (PMC10689851; doi:10.1038/s41467-023-43290-3), 2023-11-30
Supplement: 41467_2023_43290_MOESM2_ESM.pdf [file 41467_2023_43290_MOESM2_ESM.pdf]

## **Description of Additional Supplementary Files**

File Name: Supplementary Data 1

Description: Clinicopathological data of 21 Wilms tumors treated in France through the SIOF protocol 2001

File Name: Supplementary Data 2

Description: Somatic mutations called from whole-exome sequencing in 12 Wilms tumors

File Name: Supplementary Data 3

Description: Summarization of a mixed kidney cancer cohort with 95 randomly selected cases

File Name: Supplementary Data 4

Description: Tumor purity and TP53 alterations in TARGET-WT cohort

File Name: Supplementary Data 5

Description: Curated compendium of microenvironment genes related to 24 microenvironment cell subsets
